# Supplementary material for: Integrating molecular rigidity and chirality into thermally activated delayed fluorescence emitters for highly efficient sky-blue and orange circularly polarized electroluminescence
Source: Royal Society of Chemistry journal article supplement (doi:10.1039/d0mh01521k), 2020-10-31
Supplement: d0mh01521k1.pdf [file d0mh01521k1.pdf]

## Electronic Supplementary Information

### **Integrating Molecular Rigidity and Chirality into Thermally Activated Delayed Fluorescence Emitters for Highly Efficient Sky-blue and Orange Circularly Polarized Electroluminescence**

*Fan Ni,<sup>[ab]</sup> Chih-Wei Huang,<sup>[c]</sup> Yukun Tang,<sup>[c]</sup> Zhanxiang Chen,<sup>[d]</sup> Yaxun Wu,<sup>[d]</sup> Shengpeng*

*Xia,<sup>[d]</sup> Xiaosong Cao,<sup>[a]</sup> Jung-Hsien Hsu,<sup>[c]</sup> Wei-Kai Lee,<sup>[c]</sup> Kailu Zheng,<sup>[d]</sup> Zhongyan*

*Huang,<sup>[a]</sup> Chung-Chih Wu,<sup>\*[c]</sup> and Chuluo Yang<sup>\*[a]</sup>*

<sup>[a]</sup> Shenzhen Key Laboratory of Polymer Science and Technology, College of Materials Science and Engineering, Shenzhen University, Shenzhen, 518060, P. R. China. E-mail: [clyang@szu.edu.cn](mailto:clyang@szu.edu.cn)

<sup>[b]</sup> Key Laboratory of Optoelectronic Devices and Systems of Ministry of Education and Guangdong Province, College of Optoelectronic Engineering, Shenzhen University, Shenzhen 518060, China.

<sup>[c]</sup> Department of Electrical Engineering, Graduate Institute of Electronics Engineering and Graduate Institute of Photonics and Optoelectronics, National Taiwan University, Taipei, 10617, Taiwan. E-mail: [wucc@ntu.edu.tw](mailto:wucc@ntu.edu.tw)

<sup>[d]</sup> Department of Chemistry and Hubei Key Lab on Organic and Polymeric Optoelectronic Materials, Wuhan University, Wuhan, 430072, P. R. China.

F. Ni and C. W. Huang contributed equally to this work.

## Table of contents

|                                                                           |    |
|---------------------------------------------------------------------------|----|
| 1. General information.....                                               | 3  |
| 2. Devices fabrication and characterization .....                         | 9  |
| 3. Synthesis of TRZ-MeIAc and NID-MeIAc.....                              | 10 |
| 4. The report of the chiral HPLC resolution.....                          | 12 |
| 5. X-ray single crystal structure analysis .....                          | 14 |
| 6. Thermal and electrochemical properties.....                            | 16 |
| 7. Photophysical properties.....                                          | 18 |
| 8. Theoretical simulation .....                                           | 21 |
| 9. The analysis of the absolute configuration .....                       | 24 |
| 10. Supplemental electroluminescence data .....                           | 25 |
| 11. <sup>1</sup> H NMR, <sup>13</sup> C NMR and HRMS spectroscopies ..... | 34 |
| 12. References .....                                                      | 37 |

## 1. General information

Commercially available reagents were used as received without further purification. Toluene and tetrahydrofuran (THF) were dried by sodium-potassium alloy, *N,N*-dimethylacetamide (DMA) was dried by calcium hydride ( $\text{CaH}_2$ ).  $^1\text{H}$  NMR and  $^{13}\text{C}$  NMR spectra were recorded on a Bruker Advanced II (400 MHz) spectrometers.  $^1\text{H}$  and  $^{13}\text{C}$  NMR chemical shifts were reported in parts per million (ppm) relative to  $\text{Me}_4\text{Si}$  as an external standard. High-resolution mass spectra were measured on a Bruker Compact TOF mass spectrometer or a Thermo Scientific Quadrupole-Orbitrap Mass Spectrometer in electrospray ionization mode (ESI<sup>+</sup>). Differential scanning calorimetry (DSC) was performed on a NETZSCH DSC 200 PC unit at a heating rate of  $10\text{ }^\circ\text{C min}^{-1}$  from 20 to  $300\text{ }^\circ\text{C}$  under argon. The glass transition temperature ( $T_g$ ) was determined from the second heating scan. Thermogravimetric analysis (TGA) was undertaken with a Perkin Elmer Pyris instrument. The thermal stability of the samples under the nitrogen atmosphere was determined by measuring their weight loss while heating at a rate of  $10\text{ }^\circ\text{C min}^{-1}$  from 25 to  $600\text{ }^\circ\text{C}$ . The temperature of degradation ( $T_d$ ) was correlated to a 5% weight loss. Cyclic voltammetry (CV) was carried out in dichloromethane at room temperature with a CHI voltammetric analyzer. Tetrabutylammonium hexafluorophosphate ( $\text{TBAPF}_6$ ) (0.1 M) was used as the supporting electrolyte. The conventional three-electrode configuration consists of a platinum working electrode, a platinum wire auxiliary electrode, and an Ag wire pseudo-reference electrode with ferrocenium-ferrocene ( $\text{Fc}^+/\text{Fc}$ ) as the internal standard. Formal potentials are calculated as the average of cyclic voltammetric peaks. UV-vis absorption spectra were recorded on a Shimadzu UV-2700 recording spectrophotometer. Fluorescence and phosphorescence emission spectra at room temperature or 77 K were measured on a Hitachi F-4600 spectrophotometer.  $E_S$  and  $E_T$  were calculated from the onset of the fluorescence spectra and the phosphorescence spectra, respectively. The transient photoluminescence decay curves were measured on an Edinburgh FLS920 spectrophotometer. Absolute PLQYs were obtained using a Quantaaurus-QY measurement system (C11347-11, Hamamatsu Photonics). The circular dichroism (CD) were measured on Chirascan<sup>TM</sup> circular dichroic spectropolarimeter. The circularly polarized luminescence (CPPL and CPEL) spectra were measured on Jasco CPL-300 spectrometer. The test mode adopts “Slit” mode with the  $E_x$  and  $E_m$  Slit width  $3000\text{ }\mu\text{m}$  and the digital integration time (D.I.T.) is 2.0 s with multiple accumulations. Single-crystal X-ray-diffraction data for **TRZ-MeIAc** were collected on Rigaku Oxford Diffraction Supernova Dual Source, Cu at Zero equipped with an AtlasS2 CCD using  $\text{CuK}\alpha$  radiation. The ground state molecular structures were optimized at the B3LYP-D3(BJ)/def2-SVP level of theory.<sup>1</sup> The flexible potential surface scanning on the energy of the ground state geometry at different

twisted angles was based on B3LYP/def2-SVP level of theory. Energy gaps between the S<sub>1</sub> and T<sub>1</sub> states were calculated using the PBE0/def2-SVP theory.<sup>2</sup> The configuration of the S<sub>1</sub> state was calculated at the CAM-B3LYP/def2-SVP level. The flexible potential surface scanning on the energy of the excited singlet state geometry at different twisted angles was based on CAM-B3LYP/def2-SVP level of theory. The RMSD values between S<sub>0</sub> and S<sub>1</sub> states were obtained through Multiwfn.<sup>2</sup> The oscillator strength ( $f$ ) was calculated through the nuclear ensemble approach.<sup>3</sup> The rotational strength R, electric ( $\vec{\mu}$ ) and magnetic ( $\vec{m}$ ) transition dipole moments and their vector angles ( $\theta_{\mu,m}$  in degrees) were calculated at the PBE0/def2-SVP level with the toluene solvent correction.<sup>4</sup>

The single-crystal of (*R*)-TRZ-MeIAc (CCDC number: 1971785) was obtained from the solvent diffusion method from *n*-hexane/chloroform mixed solutions.

The rate equation for singlet and triplet exciton ( $S_1$  and  $T_1$ ) is described by

$$\frac{d}{dt} \begin{pmatrix} S_1 \\ T_1 \end{pmatrix} = \begin{pmatrix} -(k_{r,S} + k_{nr,S} + k_{ISC}) & +k_{RISC} \\ k_{ISC} & -(k_{r,T} + k_{nr,T} + k_{RISC}) \end{pmatrix} \begin{pmatrix} S_1 \\ T_1 \end{pmatrix}$$

where  $k_{r,S}$ ,  $k_{nr,S}$  and  $k_{ISC}$  are the rate constants of radiative decay (fluorescence), intrinsic non-radiative decay (internal conversion) and ISC for singlet excitons, respectively.  $k_{r,T}$ ,  $k_{nr,T}$  and  $k_{RISC}$  are the rate constants of radiative decay (phosphorescence), intrinsic non-radiative decay and RISC of the triplet exciton, respectively.<sup>5</sup>

$k_p$ ,  $k_d$ ,  $k_{r,S}$ ,  $k_{RISC}$ ,  $k_{ISC}$  and  $k_{IC}^S$  can be obtained:

$$k_p = \frac{1}{\tau_p} \quad \text{Eq. S1}$$

$$k_d = \frac{1}{\tau_d} \quad \text{Eq. S2}$$

$$k_{r,s} = k_p \Phi_p + k_d \Phi_d \approx k_p \Phi_p \quad \text{Eq. S3}$$

$$k_{RISC} \approx \frac{k_p k_d \Phi}{k_{r,s}} = \frac{\Phi}{\tau_d \Phi_p} \quad \text{Eq. S4}$$

$$k_{ISC} \approx \frac{k_p k_d \Phi_d}{k_{RISC} \Phi_p} = \frac{\Phi_d}{\tau_p \Phi} \quad \text{Eq. S5}$$

$$k_{IC}^S \approx \frac{1-\Phi}{\Phi \tau_p} \Phi_p \quad \text{Eq. S6}$$

The prompt PLQY ( $\Phi_p$ ) and delayed PLQY ( $\Phi_d$ ) were determined by using the total PLQY ( $\Phi$ ) and the integrated intensity ratio between prompt and delayed components which was calculated from transient photoluminescence measurements. The intensity ratios between prompt ( $r_p$ ) and delayed ( $r_d$ ) components were determined using two fluorescent lifetimes ( $\tau_p$ ,  $\tau_d$ ) and fitting parameter ( $A_p$ ,  $A_d$ ) as follow.

$$I(t) = A_p e^{-\frac{t}{\tau_p}} + A_d e^{-\frac{t}{\tau_d}} \quad \text{Eq. S7}$$

$$r_p = \frac{A_p \tau_p}{A_p \tau_p + A_d \tau_d} \quad \text{Eq. S8}$$

$$r_d = \frac{A_d \tau_d}{A_p \tau_p + A_d \tau_d} \quad \text{Eq. S9}$$

Then, the prompt PLQY ( $\Phi_p$ ) and delayed PLQY ( $\Phi_d$ ) were determined using intensity ratio ( $r_p$ ,  $r_d$ ) and total PLQY ( $\Phi$ ).

$$\Phi = \Phi_p + \Phi_d \quad \text{Eq. S10}$$

$$\Phi_p = r_p \Phi \quad \text{Eq. S11}$$

$$\Phi_d = r_d \Phi \quad \text{Eq. S12}$$

The luminescence dissymmetry ratio can be related to the molecular transition matrix elements as follows<sup>6</sup>:

$$g_{\text{lum}} = \frac{\Delta I}{\frac{1}{2}I} = \frac{I_L - I_R}{\frac{1}{2}(I_L + I_R)} = -4i \frac{\mu_1^{gn} m_1^{gn} + \mu_2^{gn} m_2^{gn}}{|\mu_1^{gn}|^2 + |\mu_2^{gn}|^2 + |m_1^{gn}|^2 + |m_2^{gn}|^2} \quad \text{Eq. S13}$$

where  $I_L$  and  $I_R$  are the intensity of left- and right-circularly polarized light,  $\Delta I$  is the the intensity of left-circularly polarized light ( $I_L$ ) versus right-circularly polarized light ( $I_R$ ),  $I$  is the total luminescence intensity. 1 and 2 refer to laboratory axes,  $\mu_1^{gn}$  and  $\mu_2^{gn}$  are the electric transition dipole moment of the two axes respectively and  $m_1^{gn}$  and  $m_2^{gn}$  are the magnetic transition dipole moment of the two axes, respectively.

We can make the simplifying assumptions that the lineshapes for CPL and total luminescence are identical and that the number of molecules in the emitting state is independent of their orientation. The direct connection to molecular structure relies on relating the transition matrix elements from laboratory to molecular coordinate systems. For the case of a randomly oriented emitting distribution, the orientational averaging yields the following general result:

$$g_{\text{lum}} = 4\text{Re} \left[ \frac{\vec{\mu}^{gn} \cdot \vec{m}^{gn}}{|\vec{\mu}^{gn}|^2 + |\vec{m}^{gn}|^2} \right] = 4\text{Re} \left[ \frac{|\vec{\mu}^{gn}| \cdot |\vec{m}^{gn}| \cdot \cos \theta_{\mu,m}}{|\vec{\mu}^{gn}|^2 + |\vec{m}^{gn}|^2} \right] \quad \text{Eq. S14}$$

where  $\vec{\mu}^{gn}$ ,  $\vec{m}^{gn}$  are the electric and magnetic transition dipole moments, respectively.  $\theta_{\mu,m}$  is the vector angle between  $\vec{\mu}^{gn}$  and  $\vec{m}^{gn}$ .

Usually, the value of magnetic transition dipole moments ( $|\vec{m}^{gn}|$ ) are typically smaller than the value of electric transition dipole moments ( $|\vec{\mu}^{gn}|$ ) in pure organic systems, so that the value of  $|\vec{m}^{gn}|^2$  is much smaller than that of  $|\vec{\mu}^{gn}|^2$ . The Eq. S14 can be further simplified as follows:

$$g_{\text{lum}} = 4\text{Re} \left[ \frac{\vec{\mu}^{gn} \cdot \vec{m}^{gn}}{|\vec{\mu}^{gn}|^2 + |\vec{m}^{gn}|^2} \right] \approx 4\text{Re} \left[ \frac{|\vec{\mu}^{gn}| \cdot |\vec{m}^{gn}| \cdot \cos \theta_{\mu,m}}{|\vec{\mu}^{gn}|^2} \right] = 4\text{Re} \left[ \frac{|\vec{m}^{gn}| \cdot \cos \theta_{\mu,m}}{|\vec{\mu}^{gn}|} \right] \quad \text{Eq. S15}$$

Oscillator strength ( $f$ ) is a very important physical quantity during the electronic excitation process. The oscillator strength characterizes the strength of the electron excitation. The oscillator strength of the  $i$ th excited state is mainly related to the transition dipole moment and is defined as:<sup>7</sup>

$$f_i = \frac{2m_e}{3\hbar^2 e^2} E_i (D_{ix}^2 + D_{iy}^2 + D_{iz}^2) = \frac{2m_e}{3\hbar^2 e^2} E_i |\vec{\mu}_i|^2 \quad \text{Eq. S16}$$

where  $m_e$  is the mass of an electron,  $\hbar$  is the reduced Planck's constant,  $e$  is the charge of electron,  $D_{ix}$ ,  $D_{iy}$ , and  $D_{iz}$  are the electric transition dipole moments of different components, respectively;  $E_i$  is the excitation energy of the  $i$ th excited state;  $\vec{\mu}_i$  is the electric dipole moment from the ground state to the  $i$ th excited state.

The oscillator strength of the lowest excited singlet state is defined as:

$$f = \frac{2m_e}{3\hbar^2 e^2} E_{S1} (D_{1x}^2 + D_{1y}^2 + D_{1z}^2) = \frac{2m_e}{3\hbar^2 e^2} E_{S1} |\vec{\mu}|^2 \quad \text{Eq. S17}$$

where  $D_{1x}$ ,  $D_{1y}$ , and  $D_{1z}$  are the electric transition dipole moments of different components at the lowest excited singlet state, respectively;  $E_{S1}$  is the lowest excited singlet state energy;  $\vec{\mu}$  is the electric dipole moment from the ground state to the lowest excited singlet state.



## 2. Devices fabrication and characterization

All organic materials used in experiments (except for the TADF emitters) were purchased from Lumtec, Inc. All compounds were subjected to temperature-gradient sublimation under a high vacuum before use. OLEDs were fabricated on the ITO-coated glass substrates with multiple organic layers sandwiched between the transparent bottom indium-tin-oxide (ITO) anode and the top metal cathode. All material layers were deposited by vacuum evaporation in a vacuum chamber with a base pressure of  $10^{-6}$  torr. The deposition system permits the fabrication of the complete device structure in a single vacuum pump-down without breaking vacuum. The deposition rate of organic layers was kept at 0.1 - 0.2 nm/s. The doping was conducted by co-evaporation from separate evaporation sources with different evaporation rates. The active area of the device is  $1 \times 1 \text{ mm}^2$ , as defined by the 10 shadow mask for cathode deposition. The current-voltage-brightness (J-V-L) characterization of the light-emitting devices was performed with a source-measurement unit (SMU) and a spectroradiometer (DMS 201, AUTRONIC-MELCHERS GmbH). EL spectra of devices were collected by a calibrated CCD spectrograph. The angular dependence of EL intensities (and spectra) was measured by a calibrated goniometric spectroradiometer (DMS 201, AUTRONIC-MELCHERS GmbH). The external quantum efficiencies of devices were determined by collecting the total emission fluxes with a calibrated integrating-sphere measurement system and by measuring the angular distribution of the emission spectra and intensities.

### 3. Synthesis of TRZ-MeIAc and NID-MeIAc

#### 3.1 The synthesis of 5-(4-(4,6-diphenyl-1,3,5-triazin-2-yl)phenyl)-12b-methyl-5,12b-dihydroindeno[1,2,3-*kl*]acridine (TRZ-MeIAc)

2-(2-bromophenyl)-4,6-diphenyl-1,3,5-triazine (1.55 g, 4.0 mmol), MeIAc (1.19 g, 4.4 mmol), palladium(II) acetate (18 mg, 0.08 mmol), tri-*tert*-butylphosphine tetrafluoroborate (70 mg, 0.24 mmol) and sodium *tert*-butoxide (422 mg, 4.4 mmol) were added to dry toluene (20 mL). The mixture was stirred at reflux for 24 hours and then cooled to room temperature. The reaction mixture was slowly poured into water and extracted with CH<sub>2</sub>Cl<sub>2</sub> (100 mL ×3). The organic phase was dried over anhydrous Na<sub>2</sub>SO<sub>4</sub>, filtered and concentrated under reduced pressure. The crude product was purified by column chromatography with petroleum ether/CH<sub>2</sub>Cl<sub>2</sub> (*v/v* = 1/1) as eluent, finally the light yellow powder TRZ-MeIAc was obtained with a yield of 82%. The resulting product was further purified by recrystallizing from a mixture of CHCl<sub>3</sub>/hexane to give light yellow crystal. The obtained compound was further purified by vacuum sublimation (with pressure less than 10<sup>-5</sup> Pa) at 240 °C with a yield of 83%. <sup>1</sup>H NMR (400 MHz, CD<sub>2</sub>Cl<sub>2</sub>, δ): 9.03 (d, *J* = 8.4 Hz, 2H), 8.81 (d, *J* = 8.0 Hz, 4H), 8.03 (d, *J* = 7.6 Hz, 1H), 7.85 (t, *J* = 6.8 Hz, 2H), 7.58-7.68 (m, 8H), 7.43-7.49 (m, 3H), 7.23 (t, *J* = 7.6 Hz, 1H), 7.07 (t, *J* = 5.6 Hz, 2H), 6.70 (d, *J* = 8.0 Hz, 1H), 6.60 (d, *J* = 8.0 Hz, 1H), 1.51 (s, 3H); <sup>13</sup>C NMR (100 MHz, CD<sub>2</sub>Cl<sub>2</sub>, δ): 172.3, 171.6, 150.9, 145.3, 143.7, 141.3, 140.6, 138.4, 136.7, 136.4, 134.5, 133.3, 131.7, 131.0, 129.5, 129.3, 128.5, 128.0, 127.9, 127.8, 126.9, 126.3, 125.1, 122.6, 121.9, 116.3, 114.0, 112.8, 48.4, 23.0. HRMS (ESI, *m/z*): [M+H]<sup>+</sup> calcd for C<sub>41</sub>H<sub>29</sub>N<sub>4</sub><sup>+</sup>: 577.2387; found: 577.2390. Anal. calcd for C<sub>41</sub>H<sub>28</sub>N<sub>4</sub>: C, 85.39; H, 4.89; N, 9.72; found: C, 85.13; H, 5.07; N, 9.80.

### 3.2 The synthesis of 2-(4-(tert-butyl)phenyl)-6-(12b-methylindeno[1,2,3-*k*]acridin-5(12bH)-yl)-1H-benzo[*de*]isoquinoline-1,3(2H)-dione (NID-MeIAc)

4-bromo-9-(4-tert-butylphenyl)-1,8-naphthalimide (1.63 g, 4.0 mmol), MeIAc (1.19 g, 4.4 mmol), palladium(II) acetate (18 mg, 0.08 mmol), tri-tert-butylphosphine tetrafluoroborate (70 mg, 0.24 mmol) and sodium tert-butoxide (422 mg, 4.4 mmol) were added to dry toluene (20 mL). The mixture was stirred at reflux for 24 hours then cooled to room temperature. The reaction mixture was slowly poured into water and extracted with CH<sub>2</sub>Cl<sub>2</sub> (100 mL ×3). The organic phase was dried over anhydrous Na<sub>2</sub>SO<sub>4</sub>, filtered and concentrated under reduced pressure. The crude product was purified by column chromatography with petroleum ether/CH<sub>2</sub>Cl<sub>2</sub> (*v/v* = 3/1) as eluent, finally the orange-red powder NID-MeIAc was obtained with a yield of 76%. The resulting product was further purified by recrystallizing from a mixture of CHCl<sub>3</sub>/EtOH to give orange-red powder. The obtained compound was further purified by vacuum sublimation (with pressure less than 10<sup>-5</sup> Pa) at 275 °C with a yield of 91%. <sup>1</sup>H NMR (400 MHz, CD<sub>2</sub>Cl<sub>2</sub>, δ): 8.85 (d, *J* = 7.6 Hz, 1H), 8.59-8.65 (m, 2H), 8.09 (d, *J* = 6.0 Hz, 1H), 7.88-7.96 (m, 3H), 7.62-7.76 (m, 3H), 7.46-7.54 (m, 3H), 7.30 (d, *J* = 8.4 Hz, 2H), 6.99-7.15 (m, 3H), 6.02-6.43 (m, 2H), 1.59-1.65 (m, 3H), 1.43 (s, 9H); <sup>13</sup>C NMR (100 MHz, CD<sub>2</sub>Cl<sub>2</sub>, δ): 164.6, 164.3, 152.3, 150.9, 143.8, 143.4, 141.0, 138.6, 133.9, 133.5, 132.6, 131.6, 131.0, 130.2, 129.1, 128.8, 128.7, 128.4, 128.1, 128.0, 127.3, 127.1, 126.9, 126.6, 126.5, 126.3, 125.4, 124.4, 123.7, 123.0, 122.0, 115.7, 114.4, 112.1, 48.3, 35.3, 31.7, 31.2. HRMS (ESI, *m/z*): [M+Na]<sup>+</sup> calcd for C<sub>42</sub>H<sub>32</sub>N<sub>2</sub>NaO<sub>2</sub><sup>+</sup>: 619.2356; found: 619.2361. Anal. calcd for C<sub>42</sub>H<sub>32</sub>N<sub>2</sub>O<sub>2</sub>: C, 84.54; H, 5.41; N, 4.69; found: C, 84.78; H, 5.13; N, 4.73.

## 4. The report of the chiral HPLC resolution

The resolution of the enantiomers of TRZ-MeIac and NID-MeIac was conducted through chiral high-performance liquid chromatography column by DAICEL Chiral Technologies (CHINA) CO., LTD. The enantiomeric excess (e.e.) values for the two pairs of enantiomers are all above 98%.

### 4.1 The report of the chiral HPLC resolution of TRZ-MeIac

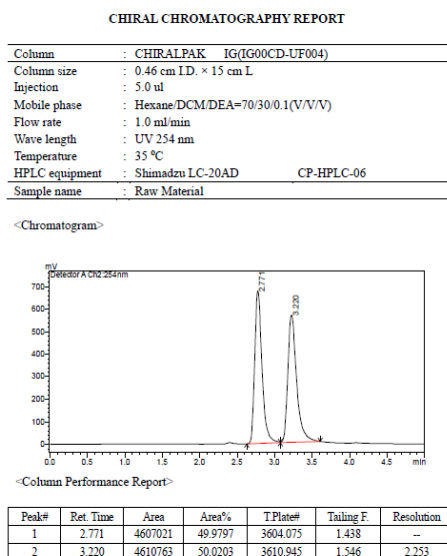

**Figure S1.** The report of the chiral HPLC resolution of TRZ-MeIac.

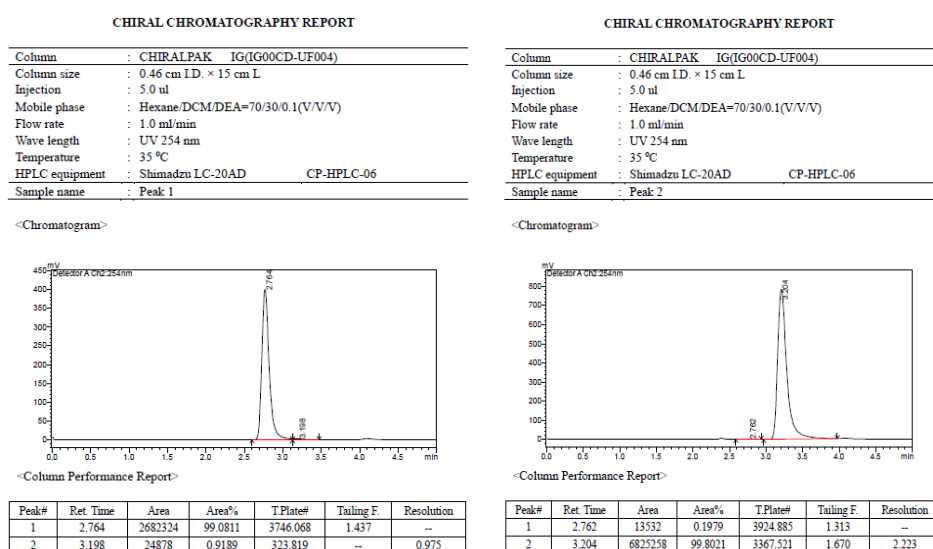

**Figure S2.** The report of the chiral HPLC resolution of (*R*)-TRZ-MeIac (Peak 1) and (*S*)-TRZ-MeIac (Peak 2).

## 4.2 The report of the chiral HPLC resolution of NID-MeIAC

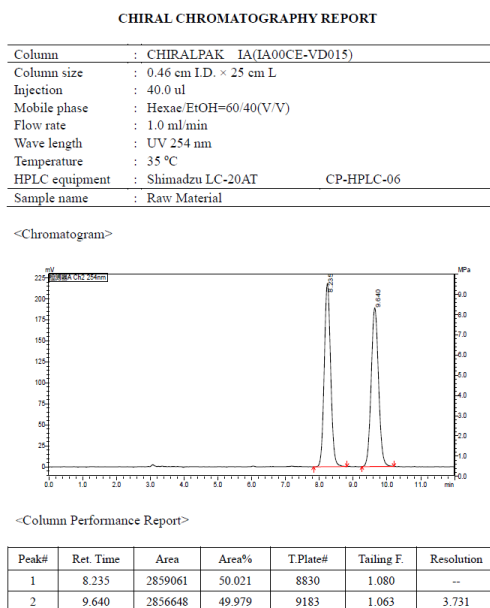

**Figure S3.** The report of the chiral HPLC resolution of NID-MeIAC.

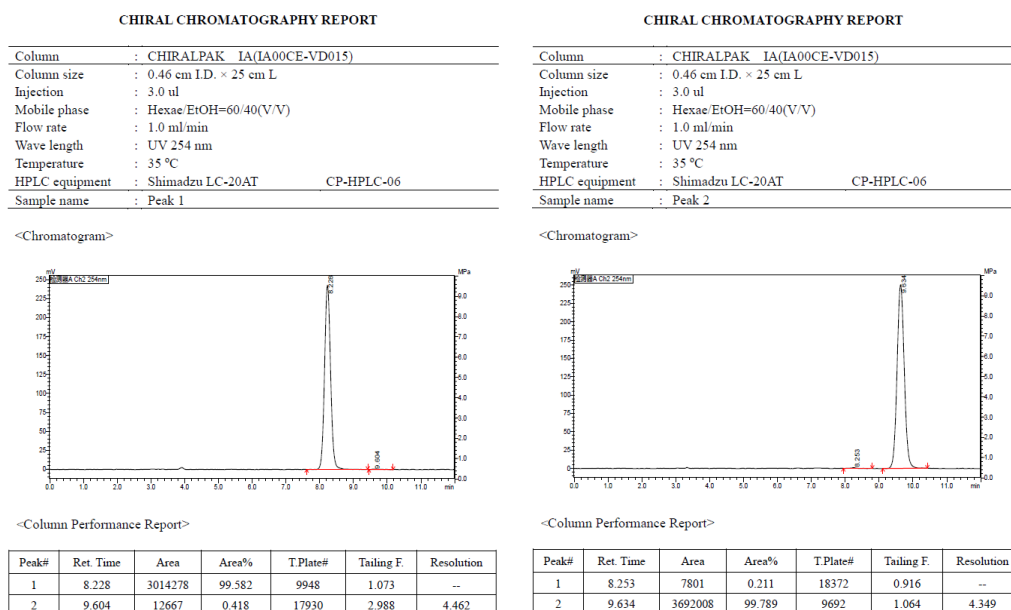

**Figure S4.** The report of the chiral HPLC resolution of (*R*)-NID-MeIAC (Peak 1) and (*S*)-NID-MeIAC (Peak 2).

## 5. X-ray single crystal structure analysis

**Table S1.** Single crystal data and structure refinement of (*R*)-TRZ-MeIAc

| Compound name                                            | ( <i>R</i> )-TRZ-MeIAc                                         |
|----------------------------------------------------------|----------------------------------------------------------------|
| Empirical formula                                        | C <sub>41</sub> H <sub>28</sub> N <sub>4</sub>                 |
| Formula weight                                           | 576.67                                                         |
| Temperature/K                                            | 100.00(10)                                                     |
| Crystal system                                           | monoclinic                                                     |
| Space group                                              | P2 <sub>1</sub>                                                |
| a/Å                                                      | 17.0490(3)                                                     |
| b/Å                                                      | 14.1638(2)                                                     |
| c/Å                                                      | 25.7784(4)                                                     |
| α/°                                                      | 90                                                             |
| β/°                                                      | 103.8957(18)                                                   |
| γ/°                                                      | 90                                                             |
| Volume/Å <sup>3</sup>                                    | 6042.75(18)                                                    |
| Z                                                        | 8                                                              |
| ρ <sub>calc</sub> /cm <sup>3</sup>                       | 1.268                                                          |
| μ/mm <sup>-1</sup>                                       | 0.582                                                          |
| F(000)                                                   | 2416.0                                                         |
| Crystal size/mm <sup>3</sup>                             | 0.12 × 0.1 × 0.08                                              |
| Radiation                                                | CuKα (λ = 1.54184)                                             |
| 2Θ range for data collection/°                           | 5.34 to 147.964                                                |
| Index ranges                                             | -21 ≤ h ≤ 19, -17 ≤ k ≤ 16, -31 ≤ l ≤ 31                       |
| Reflections collected                                    | 41719                                                          |
| Independent reflections                                  | 22475 [R <sub>int</sub> = 0.0355, R <sub>sigma</sub> = 0.0509] |
| Data/restraints/parameters                               | 22475/1/1625                                                   |
| Goodness-of-fit on F <sup>2</sup>                        | 1.017                                                          |
| Final R indexes [I > 2σ (I)]                             | R <sub>1</sub> = 0.0418, wR <sub>2</sub> = 0.0948              |
| Final R indexes [all data]                               | R <sub>1</sub> = 0.0519, wR <sub>2</sub> = 0.1010              |
| Largest diff. peak/hole / e <sup>-</sup> Å <sup>-3</sup> | 0.14/-0.18                                                     |
| Flack parameter                                          | 0.1(2)                                                         |

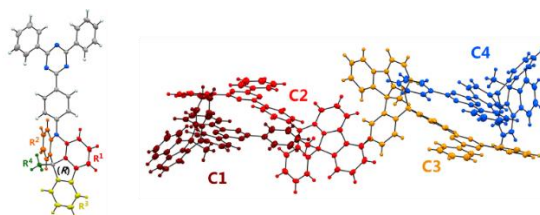

**Figure S5.** X-ray structural details of (*R*)-TRZ-MeIAc (CCDC number 1971785).

The absolute configuration-related Flack parameter of the single crystal is 0.1(2) (Table S1), suggesting the absolute configuration can be confirmed<sup>9</sup> and turns out to be *R*.

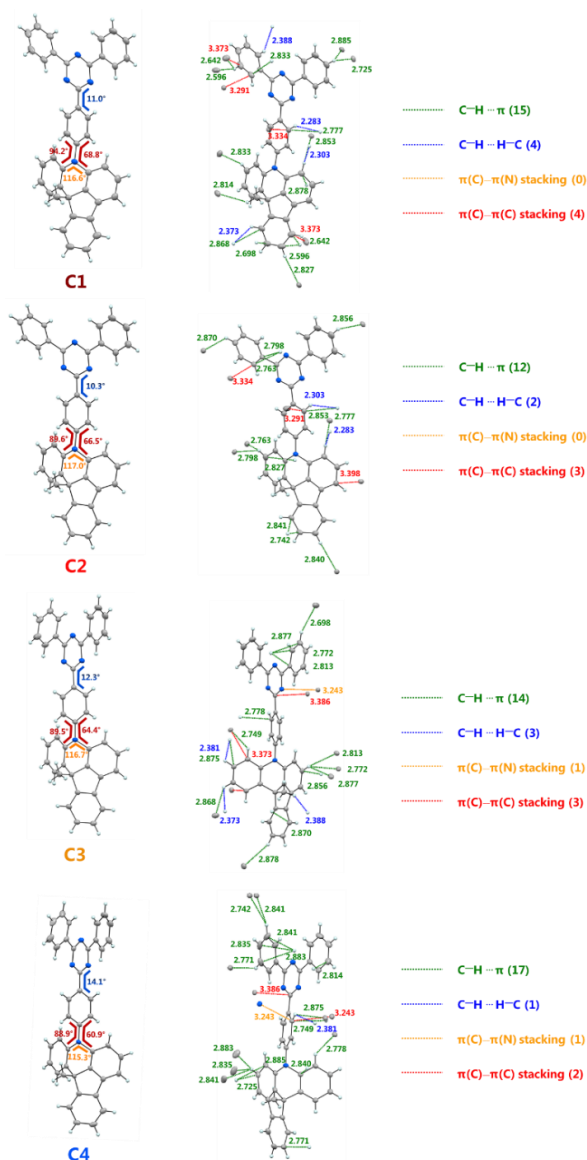

**Figure S6.** The packing model of (*R*)-TRZ-MeIAc in single crystal structure, blue ball for nitrogen, grey ball for carbon, white ball for hydrogen.

## 6. Thermal and electrochemical properties

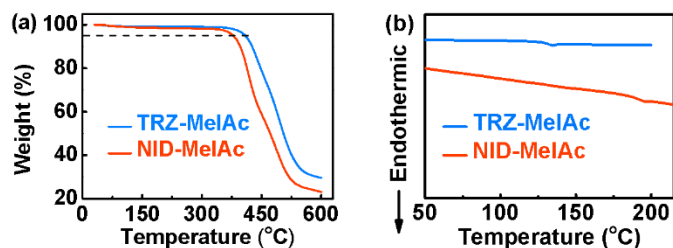

**Figure S7.** (a) Thermogravimetric analysis (TGA) curves and (b) differential scanning calorimeter (DSC) curves of TRZ-MeIAC and NID-MeIAC.

The racemization of chiral carbon-based molecules is difficult as a function of bond cleavage at the stereogenic center should be present.<sup>10</sup> The chiral carbon in MeIAC is fixed with the three linked aryl substituents forming a rigid connection with each other. The fixed structure in MeIAC means that the thermal racemization would be hard. As to evaluate the chirality stability of CPTADF emitters, the chiral HPLC analysis of (*R*)-TRZ-MeIAC after vacuum sublimation at 240 °C for 2 days was conducted. The report shows that no racemization occurs, confirming the thermal stability (**Figure S8**).

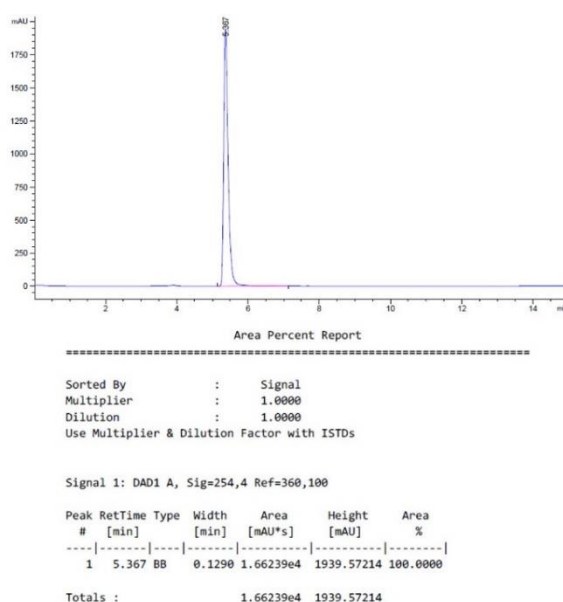

**Figure S8.** The report of the chiral HPLC analysis of (*R*)-TRZ-MeIAC after vacuum sublimation at 240 °C.



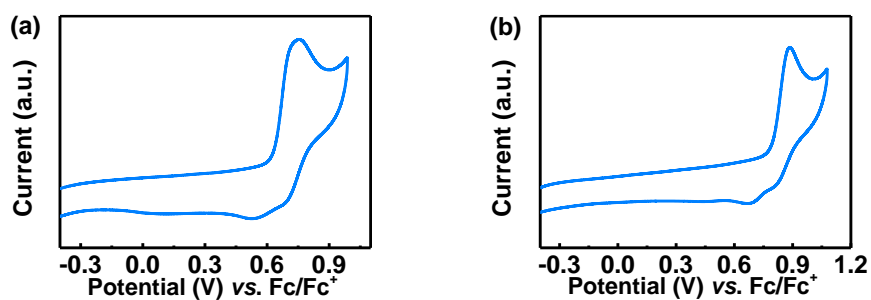

**Figure S9.** Cyclic voltammograms of TRZ-MeIAc (a) and NID-MeIAc (b) in CH<sub>2</sub>Cl<sub>2</sub>.

**Table S2.** Thermal and electrochemical properties of TRZ-MeIAc and NID-MeIAc.

| Compound  | $T_d^a$<br>[°C] | $T_g^b$<br>[°C] | $E_{\text{HOMO}}^c$<br>[eV] | $E_{\text{LUMO}}^d$<br>[eV] | $E_g^e$<br>[eV] |
|-----------|-----------------|-----------------|-----------------------------|-----------------------------|-----------------|
| TRZ-MeIAc | 409             | 125             | -5.43                       | -2.46                       | 2.97            |
| NID-MeIAc | 379             | 185             | -5.55                       | -3.10                       | 2.45            |

<sup>a)</sup> Obtained from TGA measurements. <sup>b)</sup> Obtained from DSC measurements. <sup>c)</sup> Determined by the onset of the oxidation potentials. <sup>d)</sup>  $E_{\text{LUMO}} = E_{\text{HOMO}} + E_g$ . <sup>e)</sup> Estimated from the onset of the absorption spectrum.

## 7. Photophysical properties

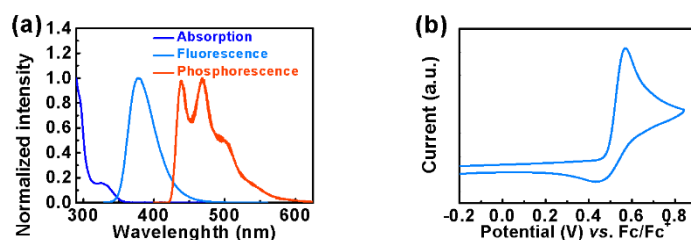

**Figure S10.** (a) Absorption and fluorescence spectra of MeIAC in  $10^{-5}$  M toluene solution at 300 K, and the phosphorescence spectrum of MeIAC in  $10^{-5}$  M toluene solution at 77 K. (b) Cyclic voltammograms of MeIAC in  $\text{CH}_2\text{Cl}_2$ .

**Table S3.** Photophysical and electrochemical properties of MeIAC.

| Compound | $\lambda_{\text{abs}}^{\text{a}}$<br>[nm] | $\lambda_{\text{fl}}^{\text{a}}$<br>[nm] | $\lambda_{\text{ph}}^{\text{b}}$<br>[nm] | $E_{\text{HOMO}}/E_{\text{LUMO}}^{\text{c}}$<br>[eV] | $E_{\text{g}}^{\text{d}}$<br>[eV] | $E_{\text{S}}/E_{\text{T}}^{\text{e}}$<br>[eV] | $\Delta E_{\text{ST}}^{\text{f}}$<br>[eV] |
|----------|-------------------------------------------|------------------------------------------|------------------------------------------|------------------------------------------------------|-----------------------------------|------------------------------------------------|-------------------------------------------|
| MeIAC    | 326                                       | 378                                      | 439, 469, 498                            | -5.29/-1.79                                          | 3.50                              | 3.52/2.91                                      | 0.61                                      |

<sup>a)</sup> Measured in toluene solution ( $10^{-5}$  M) at room temperature. <sup>b)</sup> Measured in toluene solution ( $10^{-5}$  M) at 77 K. <sup>c)</sup> The HOMO level was determined by the onset of the oxidation curves, LUMO level was calculated by using HOMO levels and  $E_{\text{g}}$  ( $E_{\text{LUMO}} = E_{\text{HOMO}} + E_{\text{g}}$ ). <sup>d)</sup> Calculated from the edge of the long-wavelength absorption. <sup>e)</sup> Determined by the onset of the fluorescent (300 K) and phosphorescent spectra (77 K) in toluene solution ( $10^{-5}$  M). <sup>f)</sup>  $\Delta E_{\text{ST}} = E_{\text{S}} - E_{\text{T}}$ .

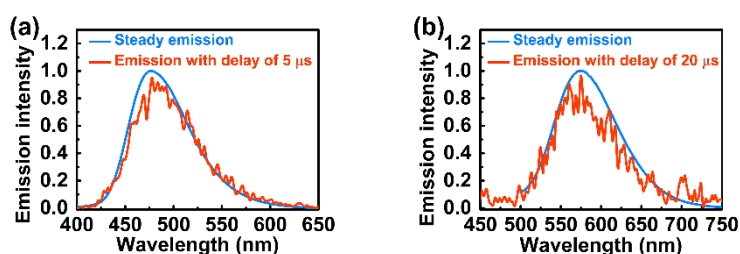

**Figure S11.** (a) The steady and time-resolved photoluminescence spectra of TRZ-MeIAC in  $10^{-5}$  M toluene solution at 300 K. (b) The steady and time-resolved photoluminescence spectra of NID-MeIAC in  $10^{-5}$  M toluene solution at 300 K.

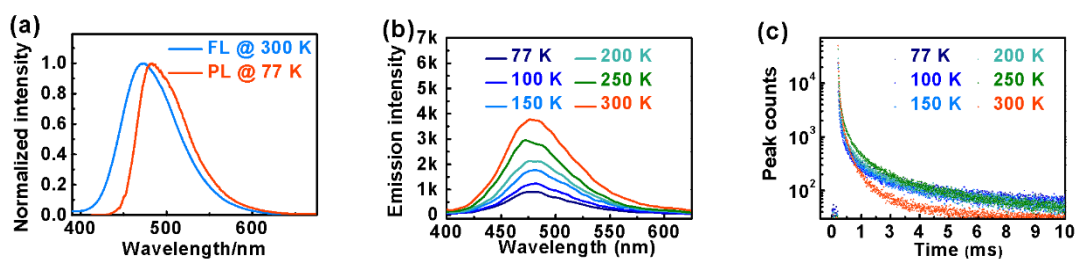

**Figure S12.** (a) The fluorescent (300 K) and phosphorescent spectra (77 K) of 12 wt.% TRZ-MeIAc doped in mCPCN film, (b-c) the steady-state emission and transient photoluminescence decay curves of 12 wt.% TRZ-MeIAc doped in mCPCN film at different temperature.

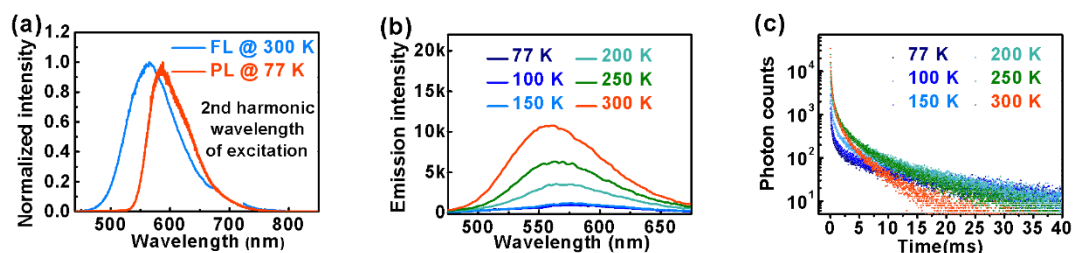

**Figure S13.** (a) The fluorescent (300 K) and phosphorescent spectra (77 K) of 6 wt.% NID-MeIAc doped in mCPCN film, (b-c) the steady-state emission and transient photoluminescence decay curves of 6 wt.% NID-MeIAc doped in mCPCN film at different temperature.

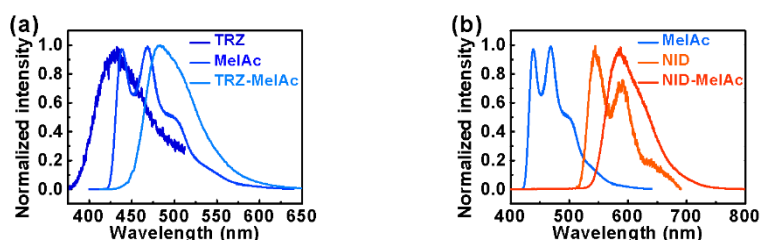

**Figure S14.** (a) The phosphorescent spectra (77 K) of neat TRZ, neat MeIAc and 12 wt.% TRZ-MeIAc doped in mCPCN film. (b) The phosphorescent spectra (77 K) of neat NID, neat MeIAc and 6 wt.% NID-MeIAc doped in mCPCN film.

**Table S4.** Photophysical properties of TRZ-MeIAC and NID-MeIAC.

| Compound  | $\lambda_{\text{abs}}^{\text{a)}$<br>[nm] | $\lambda_{\text{fl}}^{\text{a)/b)}$<br>[nm] | $\lambda_{\text{ph}}^{\text{b)}$<br>[nm] | $E_{\text{S}}/E_{\text{T}}^{\text{c)}$<br>[eV] | $\Delta E_{\text{ST}}^{\text{d)}$<br>[eV] | $\tau_{\text{p}}^{\text{a)}$<br>(ns) | $\tau_{\text{d}}^{\text{a)}$<br>( $\mu\text{s}$ ) | $\Phi_{\text{Ar}}^{\text{a)}$<br>(%) | $\Phi_{\text{air}}^{\text{a)}$<br>(%) | $g_{\text{PL}}^{\text{e)}$<br>[ $\times 10^{-4}$ ] |
|-----------|-------------------------------------------|---------------------------------------------|------------------------------------------|------------------------------------------------|-------------------------------------------|--------------------------------------|---------------------------------------------------|--------------------------------------|---------------------------------------|----------------------------------------------------|
| TRZ-MeIAC | 335, 367                                  | 476/473                                     | 488                                      | 2.93/2.74                                      | 0.19                                      | 8.6                                  | 2.3                                               | 49                                   | 30                                    | +5.9/-5.9                                          |
| NID-MeIAC | 335, 349,<br>441                          | 577/565                                     | 583                                      | 2.50/2.28                                      | 0.22                                      | 10.5                                 | 9.7                                               | 6                                    | 4                                     | +20/-19                                            |

<sup>a)</sup> Measured in toluene solution ( $1.0 \times 10^{-5}$  M) at room temperature. <sup>b)</sup> Measured in doped films with TRZ-MeIAC (12 wt.%) in mCPCN host or NID-MeIAC (6 wt.%) in mCPCN host. <sup>c)</sup> Determined by the onset of the fluorescent spectra (300 K) and phosphorescent spectra (77 K) of the doped films with TADF emitters in mCPCN host. <sup>d)</sup>  $\Delta E_{\text{ST}} = E_{\text{S}} - E_{\text{T}}$ . <sup>e)</sup>  $g_{\text{PL}}$  values of (*R/S*)-TRZ-MeIAC or (*R/S*)-NID-MeIAC enantiomers in toluene solution ( $1.0 \times 10^{-4}$  M) at maximum emission peaks.

## 8. Theoretical simulation

**Table S5.** The calculated results of HOMO and LUMO distribution and levels of Cz, (*R*)-MeIAc, FAc and DMAc by DFT at the B3LYP/def2-SVP level of theory using Gaussian 09.

| Compound           | Chemical structure                                                                  | Molecular orbital distribution                                                      |                                                                                     | $E_{\text{HOMO}}$<br>[eV] | $E_{\text{LUMO}}$<br>[eV] | $E_g$<br>[eV] | Dihedral angle ( $^\circ$ ) <sup>a</sup> |
|--------------------|-------------------------------------------------------------------------------------|-------------------------------------------------------------------------------------|-------------------------------------------------------------------------------------|---------------------------|---------------------------|---------------|------------------------------------------|
|                    |                                                                                     | HOMO                                                                                | LUMO                                                                                |                           |                           |               |                                          |
| Cz                 | 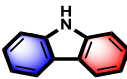   |    |    | -5.69                     | -0.95                     | 4.74          | 180                                      |
| ( <i>R</i> )-MeIAc |    |    |    | -5.44                     | -1.06                     | 4.38          | 141                                      |
| FAc                |    |    |    | -5.28                     | -1.08                     | 4.20          | 164                                      |
| DMAc               |  |  |  | -5.12                     | -0.37                     | 4.75          | 180                                      |

<sup>a</sup>The dihedral angle of the two nitrogen atom linked aromatic units (blue and red filled units in chemical structure).

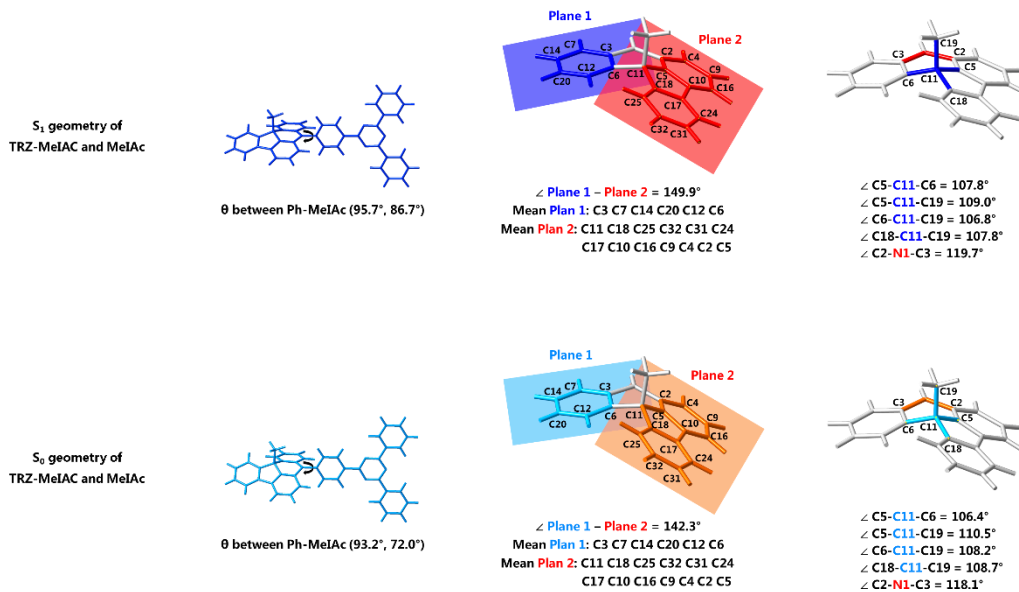

**Figure S15.** The comparison of optimized structures of S<sub>0</sub> (down) with S<sub>1</sub> state (up) of (R)-TRZ-MeIAC. The optimized structures of MeIAC in (R)-TRZ-MeIAC at S<sub>0</sub> and S<sub>1</sub> state.

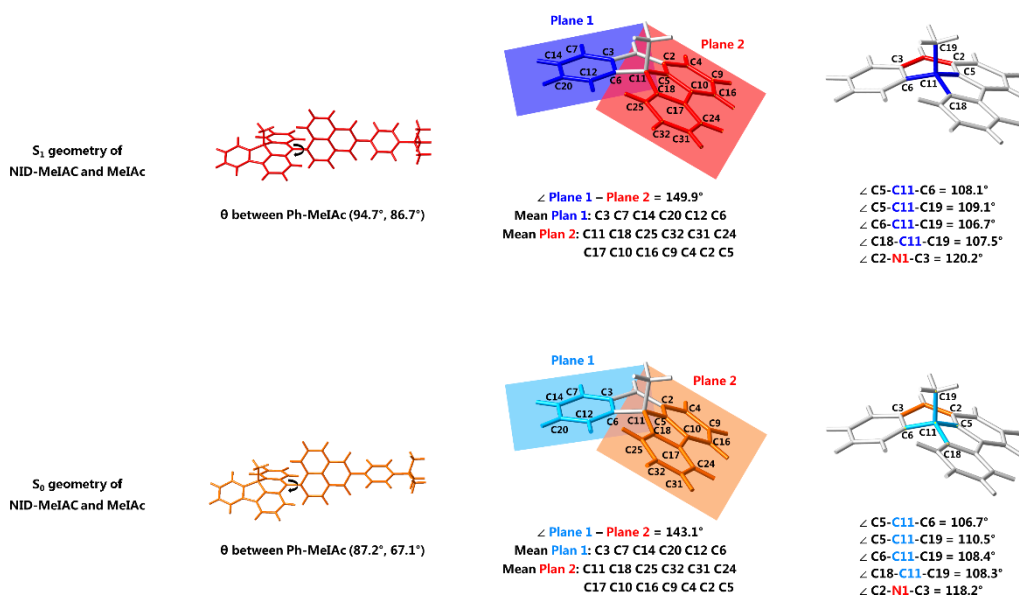

**Figure S16.** The comparison of optimized structures of S<sub>0</sub> (down) with S<sub>1</sub> state (up) of (R)-NID-MeIAC. The optimized structures of MeIAC in (R)-NID-MeIAC at S<sub>0</sub> and S<sub>1</sub> state.

**Table S6.** The calculated potential energy of quasi-equatorial and quasi-axial conformers of (*R*)-TRZ-MeIAc and (*R*)-NID-MeIAc.

| Compound               | Potential energy (a.u.)    |                       |             | $\Delta E^a)$<br>(eV) | $E_{AE}^b)$<br>(eV) | $E_{AA}^c)$<br>(eV) | $R^d)$<br>(%) | $\Delta\alpha^e)$<br>( $^\circ$ ) |
|------------------------|----------------------------|-----------------------|-------------|-----------------------|---------------------|---------------------|---------------|-----------------------------------|
|                        | Quasi-equatorial conformer | Quasi-axial conformer | Barrier     |                       |                     |                     |               |                                   |
| ( <i>R</i> )-TRZ-MeIAc | -48899.4446                | -48899.3693           | -48898.9767 | 0.0753                | 0.6074              | 0.4679              | 97.4          | 20                                |
|                        | -48899.4456                |                       | -48899.3241 | 0.0763                | 0.0452              | 0.1215              |               |                                   |
| ( <i>R</i> )-NID-MeIAc | -51115.0606                | -51114.5767           | -51114.2612 | 0.4839                | 0.3155              | 0.7994              | > 99.9        | 10                                |
|                        | -51115.0614                |                       | -51114.4619 | 0.4847                | 0.1148              | 0.5995              |               |                                   |

<sup>a)</sup> The energy difference between quasi-equatorial and quasi-axial conformer. <sup>b)</sup> The activation energy for quasi-equatorial conformer: the energy difference between the barrier and quasi-axial conformer. <sup>c)</sup> The activation energy for quasi-axial conformer: the energy difference between the barrier and quasi-equatorial conformer. <sup>d)</sup> R: The relative ratios of quasi-equatorial conformer. <sup>e)</sup> The possible molecular rotation angle.

The relative ratios of quasi-equatorial conformer were estimated by Boltzmann distribution<sup>8</sup>:

$$\% \text{ conformer } i = \frac{\exp(-\frac{E_i}{k_b T})}{\sum_j \exp(-\frac{E_j}{k_b T})}$$

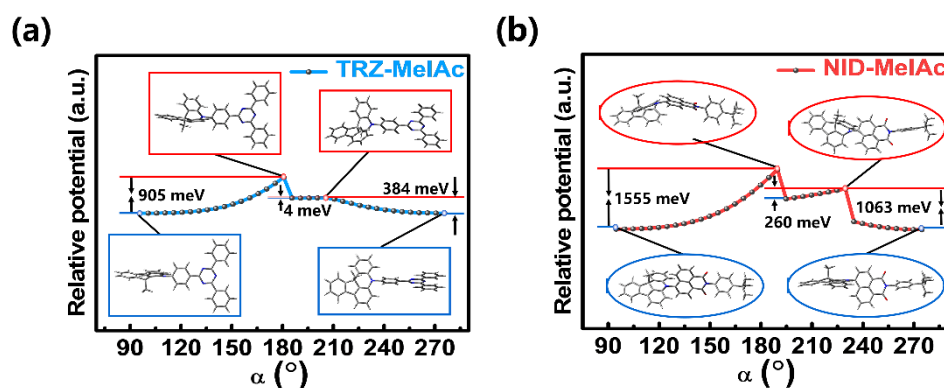

**Fig. S17** Flexible potential surface scanning on the energy of the excited singlet state geometry of (*R*)-TRZ-MeIAc (a) and (*R*)-NID-MeIAc (b) at different twisted angles ( $\alpha$ ), the maximized local states and the minimized charge transfer states for (*R*)-TRZ-MeIAc are labeled with red and blue rectangles respectively, the maximized local states and the minimized charge transfer states for (*R*)-NID-MeIAc are labeled with red and blue ellipses, respectively.

## 9. The analysis of the absolute configuration

When the direction of  $\vec{\mu}^{gn}$  is the same as that of  $\vec{m}^{gn}$  (the charge moves along the right-hand spiral path during transition), positive signals in the CPPL spectrum can be found; otherwise, the negative signals present. According to this rule, it can be expected that (*R*)-TRZ-MeIAc with same directional  $\vec{\mu}^{gn}$  and  $\vec{m}^{gn}$  (the vector angle  $\theta_{\mu,m}$  of 14.5 °) should demonstrate positive signals in CPPL spectra. The experimental results (**Figure 2b,c** in main text, **Figure S1-S2**) for (***R***)-**TRZ-MeIAc** (the obtained Peak 1 during the chiral HPLC resolution, the absolute configuration was confirmed by the single crystal) matched well with the theoretical prediction (**Table 2** in main text). And the same trend was also found in the simulations and experimental results of (*S*)-TRZ-MeIAc (**Figure 2b,c**, **Table 2**, **Figure S3-S4**).

Based on the above results, the absolute configuration of the enantiomers of NID-MeIAc could be confirmed. According to the simulated same dipole moment direction in (*R*)-NID-MeIAc (**Table 2**), the obtained Peak 1 during the chiral HPLC resolution with positive CPPL signals can be considered to be *R* configuration and the obtained Peak 2 can be considered to be *S* configuration (**Figure 2e,f** in main text, **Figure S3-S4**).



## 10. Supplemental electroluminescence data

**Table S7.** The summary of EL characteristics for OLED structures of: ITO/MoO<sub>3</sub> (1 nm)/TAPC (45 nm)/mCP (10 nm)/mCPCN: *x* wt.% (*R*)-TRZ-MeIAc or (*S*)-TRZ-MeIAc (20 nm)/3TPYMB (50 nm)/LiF/Al.

| Emitter               | Device       | V <sub>on</sub> <sup>a)</sup><br>[V] | EL <sub>peak</sub> <sup>b)</sup><br>[nm] | CE <sup>c)</sup><br>[cd·A <sup>-1</sup> ] | PE <sup>d)</sup><br>[lm·W <sup>-1</sup> ] | EQE <sup>e)</sup><br>[%] |
|-----------------------|--------------|--------------------------------------|------------------------------------------|-------------------------------------------|-------------------------------------------|--------------------------|
| <i>(R)</i> -TRZ-MeIAc | D1 (4 wt.%)  | 3.0                                  | 490                                      | 36.2                                      | 38.0                                      | 16.6                     |
|                       | D2 (8 wt.%)  | 3.0                                  | 490                                      | 45.3                                      | 47.6                                      | 19.8                     |
|                       | D3 (12 wt.%) | 2.9                                  | 494                                      | 47.8                                      | 49.6                                      | 20.3                     |
| <i>(S)</i> -TRZ-MeIAc | D4 (4 wt.%)  | 3.0                                  | 487                                      | 28.8                                      | 30.1                                      | 14.8                     |
|                       | D5 (8 wt.%)  | 3.0                                  | 490                                      | 41.6                                      | 43.6                                      | 19.1                     |
|                       | D6 (12 wt.%) | 2.9                                  | 494                                      | 42.1                                      | 44.1                                      | 18.7                     |

<sup>a)</sup> The turn-on voltage recorded at a brightness of 1 cd·m<sup>-2</sup>. <sup>b)</sup> The peak wavelength of the EL spectrum. The maximum value of <sup>c)</sup> current efficiency; <sup>d)</sup> power efficiency; <sup>e)</sup> external quantum efficiency.

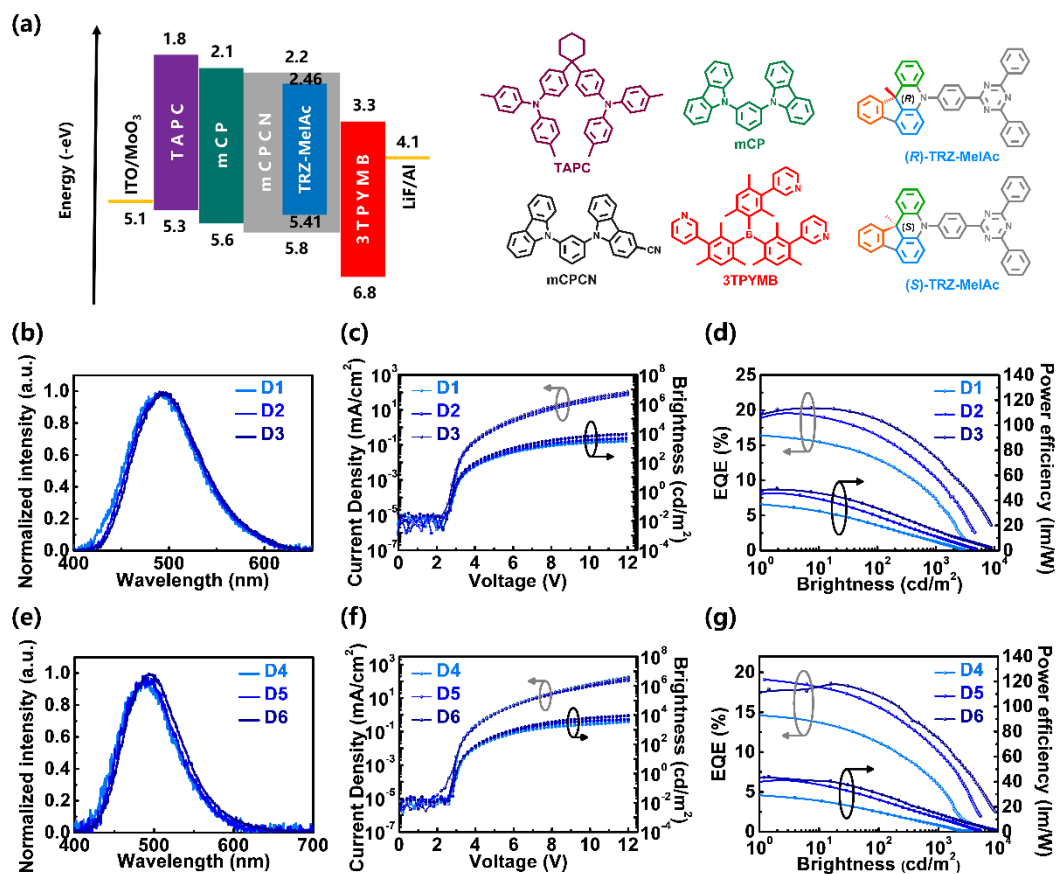

**Figure S18.** (a) The device structure, energy level diagram, and the molecular structures of the materials employed in the devices. (b-g) Electroluminescence spectra, luminance-voltage-current density characteristics, external quantum efficiency and power efficiency characteristics for devices based on (*R*)-TRZ-MeIac (D1 to D3) and (*S*)-TRZ-MeIac (D4 to D6).

**Table S8.** The summary of EL characteristics for OLED structures of: ITO/MoO<sub>3</sub> (1 nm)/TAPC (70 nm)/mCP (10 nm)/mCPCN: x wt.% (*R*)-NID-MeIAc or (*S*)-NID-MeIAc (20 nm)/3TPYMB (70 nm)/LiF/Al.

| Emitter               | Device         | V <sub>on</sub> <sup>a)</sup><br>[V] | EL <sub>peak</sub> <sup>b)</sup><br>[nm] | CE <sup>c)</sup><br>[cd·A <sup>-1</sup> ] | PE <sup>d)</sup><br>[lm·W <sup>-1</sup> ] | EQE <sup>e)</sup><br>[%] |
|-----------------------|----------------|--------------------------------------|------------------------------------------|-------------------------------------------|-------------------------------------------|--------------------------|
|                       | D7 (1.5 wt.%)  | 3.1                                  | 581                                      | 71.2                                      | 57.8                                      | 18.4                     |
| <i>(R)</i> -NID-MeIAc | D8 (3 wt.%)    | 3.1                                  | 591                                      | 72.2                                      | 46.6                                      | 18.2                     |
|                       | D9 (6 wt.%)    | 3.1                                  | 591                                      | 74.5                                      | 42.3                                      | 19.0                     |
|                       | D10 (1.5 wt.%) | 3.1                                  | 583                                      | 44.4                                      | 49.8                                      | 18.5                     |
| <i>(S)</i> -NID-MeIAc | D11 (3 wt.%)   | 3.1                                  | 589                                      | 72.6                                      | 50.2                                      | 20.3                     |
|                       | D12 (6 wt.%)   | 3.1                                  | 589                                      | 68.4                                      | 61.3                                      | 23.7                     |

<sup>a)</sup> The turn-on voltage recorded at a brightness of 1 cd·m<sup>-2</sup>. <sup>b)</sup> The peak wavelength of the EL spectrum. The maximum value of <sup>c)</sup> current efficiency; <sup>d)</sup> power efficiency; <sup>e)</sup> external quantum efficiency.

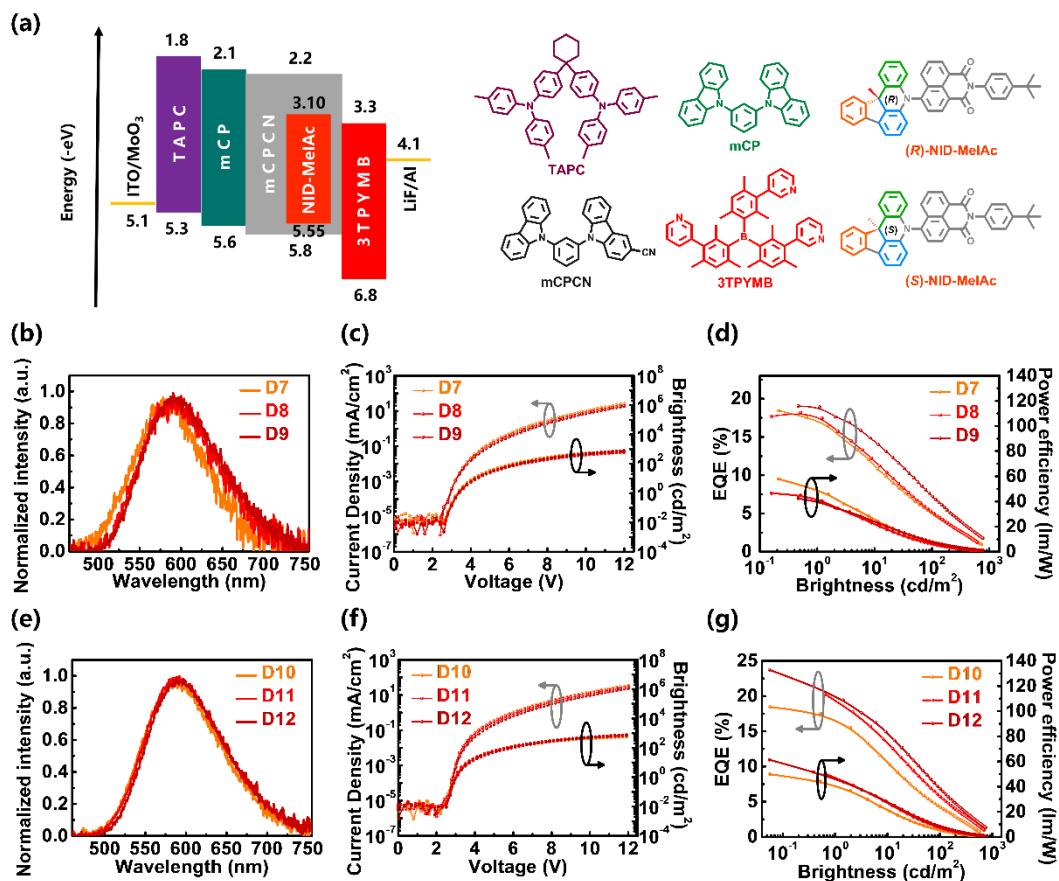

**Figure S19.** (a) The device structure, energy level diagram, and the molecular structures of the materials employed in the devices. (b-g) Electroluminescence spectra, luminance-voltage-current density characteristics, external quantum efficiency and power efficiency characteristics for devices based on (*R*)-NID-MeIAC (D7 to D9) and (*S*)-NID-MeIAC (D10 to D12).

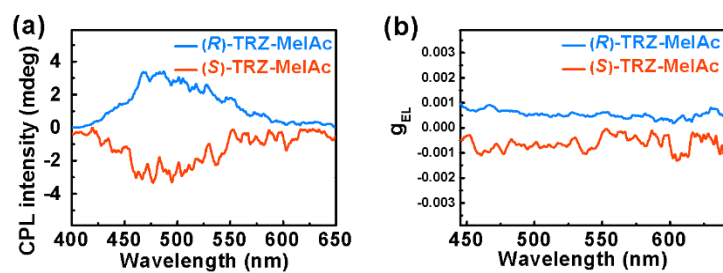

**Figure S20.** CPEL spectra (a) and  $g_{EL}$  of (R/S)-TRZ-MeIAc (b) in device D3/D6.

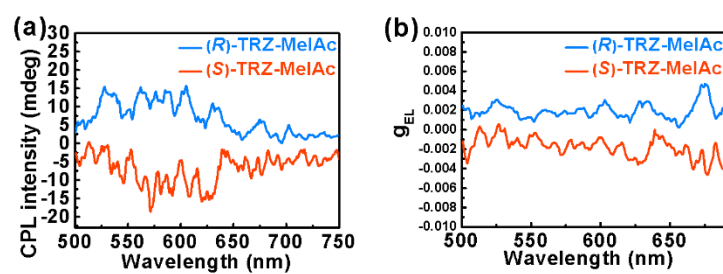

**Figure S21.** CPEL spectra (a) and  $g_{EL}$  of (R/S)-NID-MeIAc (b) in device D9/D12.

**Table S9.** The device performances of reported CP-OLEDs vs this work.

| Materials             | Structure                                                                           | Device models           | Type of emitters            | EL <sub>peak</sub> [nm] | L <sub>max</sub> [cd m <sup>-2</sup> ] | CE <sub>max</sub> [cd A <sup>-1</sup> ] | PE <sub>max</sub> [lm W <sup>-1</sup> ] | EQE <sub>max</sub> [%] | g <sub>EL</sub>         | Ref. |
|-----------------------|-------------------------------------------------------------------------------------|-------------------------|-----------------------------|-------------------------|----------------------------------------|-----------------------------------------|-----------------------------------------|------------------------|-------------------------|------|
| PPV-co-BDMO-PPV       | 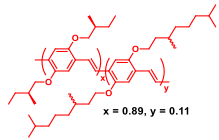   | Pure polymer layer      | Common fluorescent material | 600                     | -                                      | -                                       | -                                       | -                      | -1.7 × 10 <sup>-3</sup> | [11] |
| (S)-PF4/1             |    | Pure polymer layer      | Common fluorescent material | 425/512                 | -                                      | -                                       | -                                       | -                      | +0.16                   | [12] |
| (S)-PF4/1-co-PF8      |    | Pure polymer layer      | Common fluorescent material |                         | -                                      | -                                       | -                                       | -                      | +0.05                   |      |
| (S)-PF8/1/1           |    | Pure polymer layer      | Common fluorescent material |                         | -                                      | -                                       | -                                       | -                      | -0.25                   |      |
| (R)-PF2/6             |   | Pure polymer layer      | Common fluorescent material |                         | -                                      | -                                       | -                                       | -                      | -0.25                   |      |
| C-522                 |  | Pure oligomer layer     | Common fluorescent material | 425/450                 | -                                      | 0.94                                    | -                                       | -                      | +0.35                   | [13] |
| F8BT/1-aza[6]helicene |  | F8BT with chiral dopant | Common fluorescent material | 540                     | 3000                                   | -                                       | 1.1                                     | -                      | -0.2/<br>+0.2           | [14] |
| c-PFBT                |  | Pure polymer layer      | Common fluorescent material | 510                     | 80                                     | -                                       | 0.12                                    | -                      | -0.8                    | [15] |
| F8BT/R5011            |  | F8BT Dispersed in R5011 | Common fluorescent material | 546                     | 4000                                   | 4.46                                    | -                                       | -                      | -1.13                   | [16] |
| S/R-P                 |  | Pure polymer layer      | Common fluorescent material | 505                     | 1669/<br>1270                          | 0.926/<br>0.833                         | 0.390/<br>0.422                         | -                      | +0.024/<br>-0.019       | [17] |

|                                                                     |                                                                                                                                                                    |                            |                                   |             |                                 |                                 |      |                                 |                                                |      |
|---------------------------------------------------------------------|--------------------------------------------------------------------------------------------------------------------------------------------------------------------|----------------------------|-----------------------------------|-------------|---------------------------------|---------------------------------|------|---------------------------------|------------------------------------------------|------|
| S/R-2                                                               | 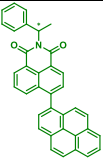                                                                                  | Pure small molecular layer | Common fluorescent material       | 520         | 19575/18411                     | 2.8/3.2                         | -    | 1.0/1.1                         | +0.0022/-0.0022                                | [18] |
| R/S-5<br>R/S-6                                                      | <br>R <sub>1</sub> = 1-pyrene, R <sub>2</sub> = -C <sub>6</sub> H <sub>4</sub> -n | Pure small molecular layer | Common fluorescent material       | 460/<br>480 | 11336/10886/<br>24806/<br>22880 | 3.91/<br>3.86/<br>5.17/<br>4.26 | -    | 2.79/<br>2.17/<br>3.09/<br>2.27 | +0.0056/<br>-0.0052/<br>+0.00078/<br>-0.00074/ | [19] |
| S/R-6                                                               | <br>R = -C <sub>6</sub> H <sub>4</sub> -m                                         | Pure small molecular layer | Common fluorescent material       | 534         | 8061/<br>7946                   | 1.32/<br>1.26                   | -    | 0.48/<br>0.45                   | +0.0036/<br>-0.0032/                           | [20] |
| BA                                                                  |                                                                                   | Dispersed in 26DCzPPy      | Common fluorescent material       | 593         | 7145                            | 5.12                            | 3.4  | 2.0                             | +0.00045/<br>-0.0005                           | [21] |
| DCz                                                                 |                                                                                   |                            |                                   | 508         | 22956                           | 17.6                            | 11.2 | 5.5                             | +0.00077/<br>-0.00083                          |      |
| DPA                                                                 |                                                                                  |                            |                                   | 540         | 13426                           | 9.7                             | 6.4  | 2.5                             | +0.00057/<br>-0.00078                          |      |
| PT                                                                  |                                                                                 |                            |                                   | 420         | 1936                            | 0.91                            | 0.4  | 1.7                             | +0.0013/<br>-0.0014                            |      |
| CsEu(hfbc) <sub>4</sub>                                             |                                                                                 | Dispersed in PVK and OXD7  | Lanthanide complexes              | 595,<br>612 | -                               | -                               | -    | 0.05                            | -1.00 to<br>+0.19                              | [22] |
| Δ-fac-Ir(ppy) <sub>3</sub> /<br>Δ-fac-Ir(ppy) <sub>3</sub>          |                                                                                 | Dispersed in mCP           | Phosphorescent Iridium complexes  | 522/<br>515 | -                               | -                               | -    | -                               | -0.00028/<br>+0.00068                          | [23] |
| Δ-fac-Ir(ppy) <sub>2</sub> acac/<br>Δ-fac-Ir(ppy) <sub>2</sub> acac |                                                                                 |                            |                                   | 533/<br>509 |                                 |                                 |      |                                 | -0.00031/<br>+0.0043                           |      |
| Δ-Ir(dppy) <sub>2</sub> (R-edp)/<br>Δ-Ir(dppy) <sub>2</sub> (R-edp) |                                                                                 |                            |                                   | 514/<br>510 |                                 |                                 |      |                                 | -0.0026/<br>+0.00049/                          |      |
| 1                                                                   |                                                                                 | Dispersed in PVK and OXD7  | Phosphorescent Platinum complexes | 615         | 222                             | 0.25                            | 0.11 | -                               | -0.38                                          | [24] |
| SI/R1                                                               |                                                                                 | Dispersed in PVK and OXD7  | Phosphorescent Iridium complexes  | 526/<br>558 | 4257                            | 7.50                            | 2.44 | -                               | up to 10 <sup>-3</sup>                         | [25] |

|                                                                                      |  |                                |                                   |               |             |             |             |             |                                                  |      |
|--------------------------------------------------------------------------------------|--|--------------------------------|-----------------------------------|---------------|-------------|-------------|-------------|-------------|--------------------------------------------------|------|
| (P/M)-Pt                                                                             |  | Dispersed in TCTA and 26DCzPPy | Phosphorescent Platinum complexes | ~650          | 9732/11590  | 19.52/22.52 | 15.39/18.62 | 16.29/18.81 | -0.0016/<br>+0.0014<br>to<br>-0.0037/<br>+0.0051 | [26] |
| $\Delta$ -(tfpqz) <sub>2</sub> Ir(R-L2)/<br>$\Lambda$ -(tfpqz) <sub>2</sub> Ir(S-L2) |  | Dispersed in 26DCzPPy          | Phosphorescent Iridium complexes  | 595/599       | 34986/44745 | 54.6/54.4   | 51.3/52.1   | 23.7/23.6   | +0.0005/<br>-0.0003                              | [27] |
| [Pt(iqbt)(S-L <sup>o</sup> )(1-4)]                                                   |  | Dispersed in PVK-PBD           | Phosphorescent Platinum complexes | 732           | -           | -           | -           | up to 0.93  | up to 0.0027                                     | [28] |
| BP1                                                                                  |  | Dispersed in CBP               | Phosphorescent Platinum complexes | 600, 650, 715 | 1062/1018   | 1.43/1.52   | 0.90/0.80   | 1.32/1.49   | +0.0012/<br>-0.0007                              | [29] |
| BP2                                                                                  |  |                                |                                   | 600, 650, 715 | 3500/3318   | 2.83/2.64   | 1.38/1.28   | 2.15/2.01   | +0.0011/<br>-0.0010                              |      |
| (P/M)-SD                                                                             |  | Dispersed in 26DCzPPy          | Phosphorescent Platinum complexes | 653           | 2156/1927   | 2.32/2.26   | 1.97/2.03   | 4.60/4.42   | +0.0013/<br>-0.0011                              | [30] |
| R/S-ZnL                                                                              |  | Pure small molecular layer     | Zn(II) Complex                    | 576           | 860/1000    | 0.18/0.19   | 0.071/0.085 | 0.038/0.042 | +0.015/<br>-0.015                                | [31] |
| (R/S)-1                                                                              |  | Dispersed in mCP               | TADF emitter                      | -             | -           | 34.7        | 16.3        | 9.1         | -                                                | [32] |
| (R,R/S,S)-CAI-Cz                                                                     |  | Dispersed in mCBP              | TADF emitter                      | 520           | -           | 59.4/59.0   | 52.9/53.0   | 19.8/19.7   | +0.0023/<br>-0.0017                              | [33] |
| R/S-BN-CF,<br>R/S-BN-CCB,<br>R/S-BN-DCB,<br>and R/S-BN-AF                            |  | Dispersed in mCP               | TADF emitter                      | 496-597       | 1473-6633   | 1.1-24.6    | 0.7-19.6    | 0.6-9.3     | -0.091 to<br>+0.084                              | [34] |



|                                                             |                                                                                                             |                                                     |              |         |               |           |           |           |                       |           |
|-------------------------------------------------------------|-------------------------------------------------------------------------------------------------------------|-----------------------------------------------------|--------------|---------|---------------|-----------|-----------|-----------|-----------------------|-----------|
| ( <i>R/S</i> )-OBN-Cz                                       | 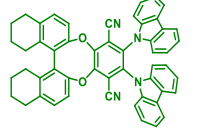                           | Dispersed in 26DCzPPy or pure small molecular layer | TADF emitter | 501/526 | 46651 / 35633 | 93.7/47.8 | 59.7/34.6 | 32.6/14.0 | +0.00228/<br>-0.00234 | [35]      |
| <i>R/S</i> -1                                               |                            | Dispersed in TCTA or pure small molecular layer     | TADF emitter | 580-604 | 2726-11783    | 0.22-4.2  | -         | 0.12-1.8  | -0.0009 to +0.001     | [36]      |
| CzPhTrz                                                     |                            | Dispersed in mCP                                    | TADF emitter | 480     | -             | 34.8      | 32.5      | 17.0      | -                     | [37]      |
| ( <i>R/S</i> )-OBN-DPA                                      |                            | Dispersed in TCTA or pure small molecular layer     | TADF emitter | 544/560 | 15161 - 25418 | 22.7-45.3 | 15.8-30.7 | 6.6-12.3  | -0.0022 to +0.0029    | [38]      |
| (-)-( <i>R,R</i> )-CAI-DMAC/<br>(+)-( <i>S,S</i> )-CAI-DMAC |                            | Dispersed in CBP                                    | TADF emitter | 592     | -             | 28.8/28.5 | 26.6/28.0 | 12.3/12.4 | -                     | [39]      |
| <i>S/R</i> -CPDCz,<br><i>S/R</i> -CPDCB                     | <br>R = H or <i>t</i> -Bu | Dispersed in mCP                                    | TADF emitter | 492-518 | 923-7700      | 21.4-39.5 | 15.7-30.3 | 8.4-12.4  | -0.0039 to +0.0035    | [40]      |
| <i>S/R</i> -Cz-Ax-CN                                        |                          | Dispersed in DPEPO                                  | TADF emitter | 468     | -             | 20.9      | 16.4      | 12.7      | -0.012/<br>+0.014     | [41]      |
| <i>S/R</i> -BPPOACZ                                         |                          | Dispersed in 2,6-DCzPPy                             | TADF emitter | 537     | 38128         | 61.0      | 42.6      | 17.8      | +0.0045/<br>-0.0028   | [42]      |
| ( <i>R/S</i> )-TRZ-MeIac                                    |                          | Dispersed in mCPCN                                  | TADF emitter | 494     | 8796/9074     | 47.8/42.1 | 49.6/44.1 | 20.3/18.7 | +0.00071/<br>-0.00084 | This work |
| ( <i>R/S</i> )-NID-MeIac                                    |                          | Dispersed in mCPCN                                  | TADF emitter | 591     | 772/750       | 74.5/68.4 | 42.3/61.3 | 19.0/23.7 | +0.0020/<br>-0.0024   |           |

## 11. $^1\text{H}$ NMR, $^{13}\text{C}$ NMR and HRMS spectroscopies

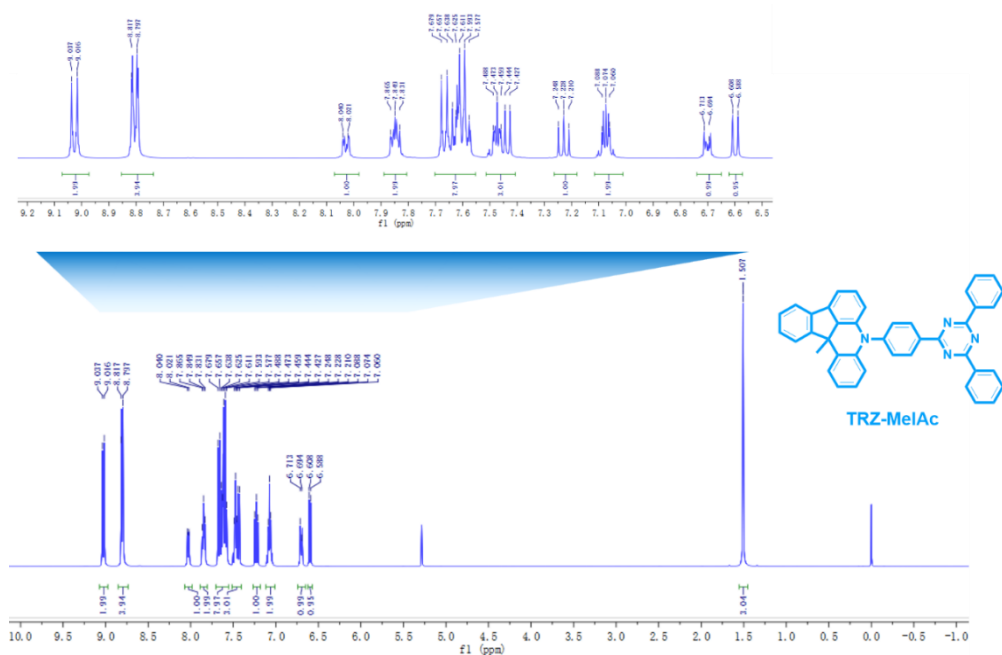

$^1\text{H}$  NMR spectroscopies for TRZ-MeAc

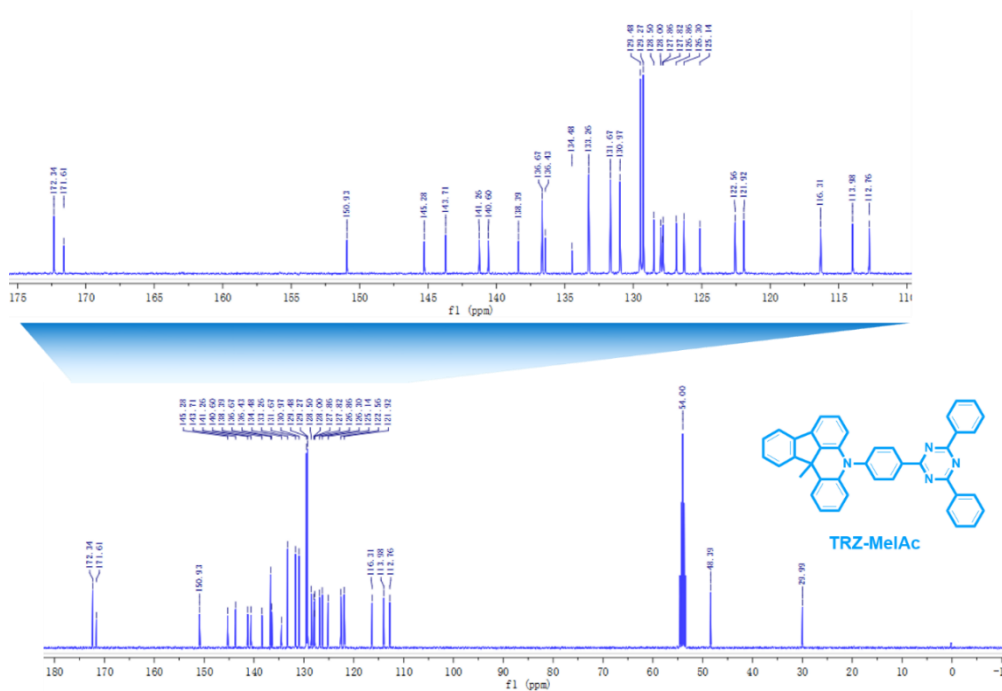

$^{13}\text{C}$  NMR spectroscopies for TRZ-MeAc



**+MS, 0.6min #34**

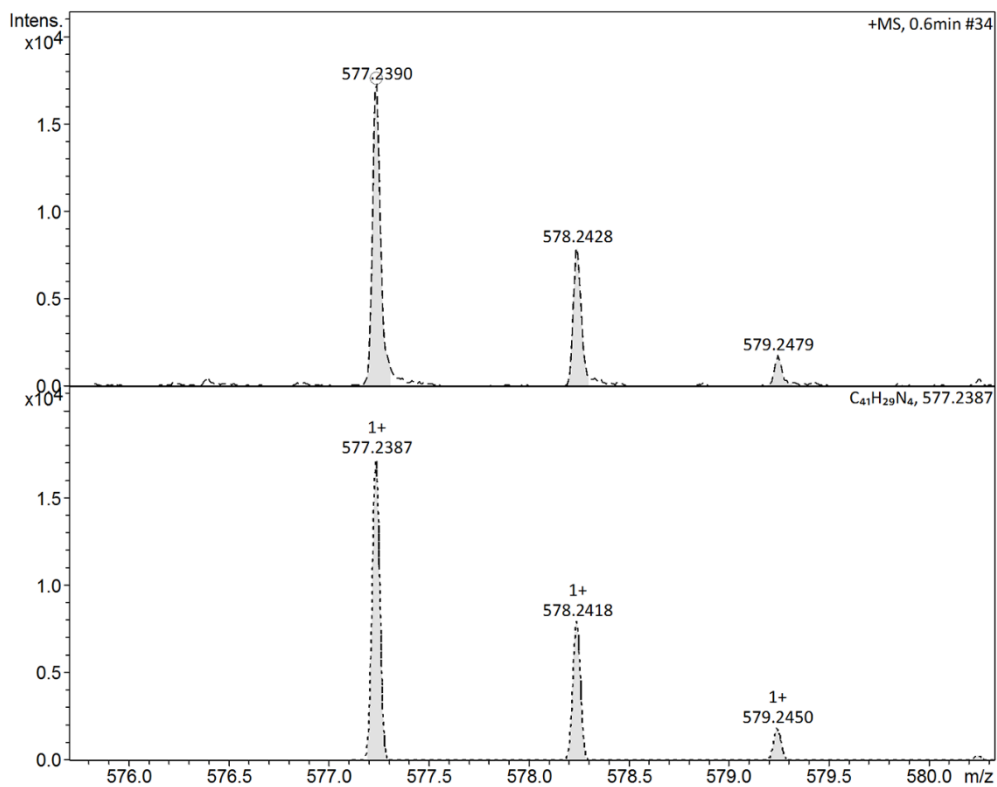

HRMS for TRZ-MeIac

**+MS, 0.2-0.6min #11-35**

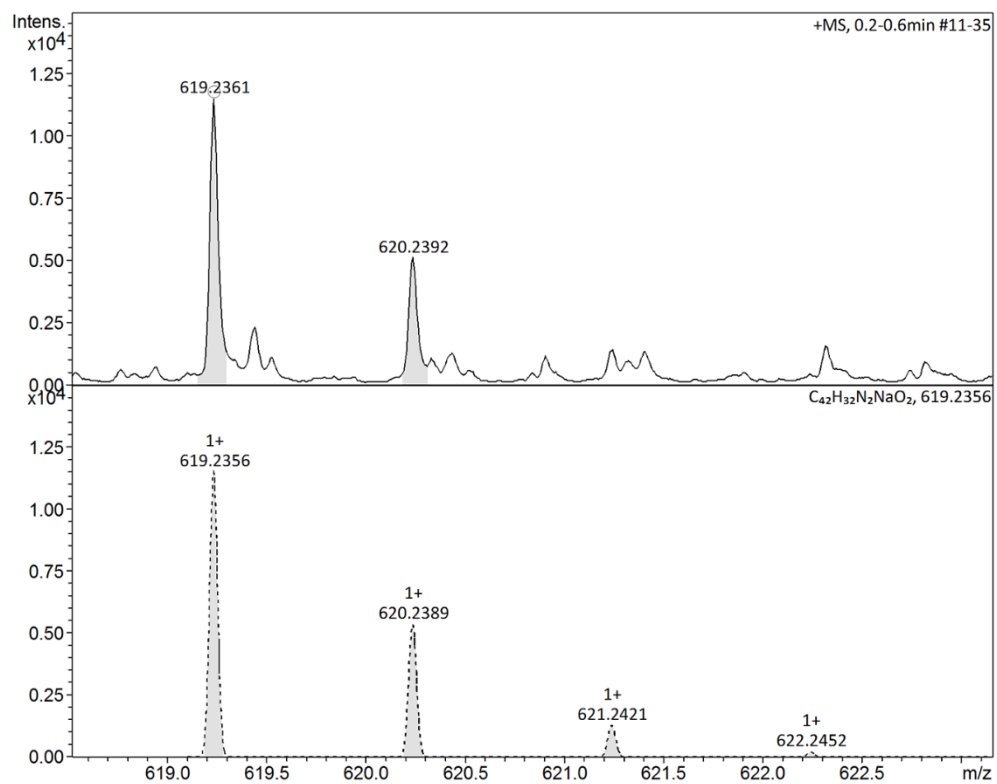

HRMS for NID-MeIac

## 12. References

- (1) S. Grimmea, J. Antony, S. Ehrlich, H. Krieg, *J. Chem. Phys.* **2010**, *132*, 154104.
- (2) T. Lu, F. Chen, *J. Comput. Chem.* **2012**, *33*, 580.
- (3) W. Zeng, S. Gong, C. Zhong, C. Yang, *J. Phys. Chem. C* **2019**, *123*, 10081.
- (4) H. Tanaka, Y. Kato, M. Fujiki, Y. Inoue, T. Mori, *J. Phys. Chem. A* **2018**, *122*, 7378.
- (5) K. C. Pan, S. W. Li, Y. Y. Ho, Y. J. Shiu, W. L. Tsai, M. Jiao, W. K. Lee, C. C. Wu, C. L. Chung, T. Chatterjee, *Adv. Funct. Mater.* **2016**, *26*, 7560.
- (6) N. Berova, P. L. Polavarapu, K. Nakanishi, R. W. Woody, *Comprehensive Chiroptical Spectroscopy, Volume 1: Instrumentation, Methodologies, and Theoretical Simulations*, First Edition. Wiley, Hoboken, NJ, USA **2012**.
- (7) a) R. C. Hilborn, *Am. J. Phys.* **1982**, *50*, 982; b) M. Uejima, T. Sato, D. Yokoyama, K. Tanaka, J.-W. Park, *Phys. Chem. Chem. Phys.* **2014**, *16*, 14244; c) X. Mu, X. Chen, J. Wang, M. Sun, *J. Phys. Chem. A* **2019**, *123*, 8071.
- (8) a) Y. Olivier, M. Moral, L. Mucciolicd, J.-C. Sancho-Garc á, *J. Mater. Chem. C* **2017**, *5*, 5718; b) K. Wang, C. Zheng, W. Liu, K. Liang, Y. Shi, S. Tao, C. Lee, X. Ou, X. Zhang, *Adv. Mater.* **2017**, *29*, 1701476; c) W. Li, X. Cai, B. Li, L. Gan, Y. He, K. Liu, D. Chen, Y. Wu, S. Su, *Angew. Chem. Int. Ed.* **2019**, *58*, 582.
- (9) H. D. Flack, *Acta Cryst.* **1983**, *A39*, 876.
- (10) B. Kim, G. Storch, G. Banerjee, B. Q. Mercado, J. Castillo-Lora, G. W. Brudvig, J. M. Mayer, S. J. Miller, *J. Am. Chem. Soc.* **2017**, *139*, 15239.
- (11) E. Peeters, M. P. T. Christiaans, R. A. J. Janssen, H. F. M. Schoo, H. P. J. M. Dekkers, E. W. Meijer, *J. Am. Chem. Soc.* **1997**, *119*, 9909.
- (12) a) M. Oda, H. Nothofer, G. Lieser, U. Scherf, S. C. J. Meskers, D. Neher, *Adv. Mater.* **2000**, *12*, 362; b) M. Oda, H. Nothofer, U. Scherf, V. Šunjić, D. Richter, W. Regenstein, D. Neher, *Macromolecules* **2002**, *35*, 6792.
- (13) Y. Geng, A. Trajkovska, S. W. Culligan, J. J. Ou, H. M. P. Chen, D. Katsis, S. H. Chen, *J. Am. Chem. Soc.* **2003**, *125*, 14032.
- (14) Y. Yang, R. C. Costa, D.-M. Smilgies, A. J. Campbell, M. J. Fuchter, *Adv. Mater.* **2013**, *25*, 2624.
- (15) D. D. Nuzzo, C. Kulkarni, B. Zhao, E. Smolinsky, F. Tassinari, S. C. J. Meskers, R. Naaman, E. W. Meijer, R. H. Friend, *ACS Nano* **2017**, *11*, 12713.
- (16) a) D. Lee, J. Song, Y. Lee, C. Yu, J. Kim, *Adv. Mater.* **2017**, *29*, 1700907; b) J. Jung, D. Lee, J. Kim, C. Yu, *J. Mater. Chem. C* **2018**, *6*, 726.
- (17) L. Yang, Y. Zhang, X. Zhang, N. Li, Y. Quan, Y. Cheng, *Chem. Commun.* **2018**, *54*, 9663.

- (18) Y. Zhang, X. Zhang, H. Zhang, Y. Xiao, Y. Quan, S. Ye, Y. Cheng, *J. Phys. Chem. C* **2019**, *123*, 24746.
- (19) X. Zhang, Y. Zhang, Y. Li, Y. Quan, Y. Cheng, Y. Li, *Chem. Commun.* **2019**, *55*, 9845.
- (20) X. Zhang, Y. Zhang, H. Zhang, Y. Quan, Y. Li, Y. Cheng, S. Ye, *Org. Lett.* **2019**, *21*, 439.
- (21) X. Luo, H. Han, Z. Yan, Z. Wu, J. Su, J. Zou, Z. Zhu, Y. Zheng, J. Zuo, *ACS Appl. Mater. Interfaces* **2020**, *20*, 23172.
- (22) a) F. Zinna, U. Giovanella, L. D. Bari, *Adv. Mater.* **2015**, *27*, 1791; b) F. Zinna, M. Pasini, F. Galeotti, C. Botta, L. D. Bari, U. Giovanella, *Adv. Funct. Mater.* **2017**, *27*, 1603719.
- (23) T. Li, Y. Jing, X. Liu, Y. Zhao, L. Shi, Z. Tang, Y. Zheng, J. Zuo, *Sci. Rep.* **2015**, *5*, 14912.
- (24) J. R. Brandt, X. Wang, Y. Yang, A. J. Campbell, M. J. Fuchter, *J. Am. Chem. Soc.* **2016**, *138*, 9743.
- (25) J. Han, S. Guo, J. Wang, L. Wei, Y. Zhuang, S. Liu, Q. Zhao, X. Zhang, W. Huang, *Adv. Optical Mater.* **2017**, *5*, 1700359.
- (26) Z. Yan, X. Luo, W. Liu, Z. Wu, X. Liang, K. Liao, Y. Wang, Y. Zheng, L. Zhou, J. Zuo, Y. Pan, H. Zhang, *Chem. Eur. J.* **2019**, *25*, 5672.
- (27) Z. Yan, K. Liao, H. Han, J. Su, Y. Zheng, J. Zuo, *Chem. Commun.* **2019**, *55*, 8215.
- (28) G. Fu, Y. He, W. Li, B. Wang, X. Lü, H. He, W. Y. Wong, *J. Mater. Chem. C* **2019**, *7*, 13743.
- (29) Z. Jiang, J. Wang, T. Gao, J. Ma, Z. Liu, R. Chen, *ACS Appl. Mater. Interfaces* **2020**, *12*, 9520.
- (30) Z. Yan, X. Luo, K. Liao, Y. Zheng, J. Zuo, *Front. Chem.* **2020**, *8*, 501.
- (31) Y. Chen, X. Li, N. Li, Y. Quan, Y. Cheng, Y. Tang, *Mater. Chem. Front.* **2019**, *3*, 867.
- (32) S. Feuillastre, M. Pauton, L. Gao, A. Desmarchelier, A. J. Riives, D. Prim, D. Tondelier, B. Geffroy, G. Muller, G. Clavier, G. Pieters, *J. Am. Chem. Soc.* **2016**, *138*, 3990.
- (33) M. Li, S. Li, D. Zhang, M. Cai, L. Duan, M. Fung, C. Chen, *Angew. Chem. Int. Ed.* **2018**, *57*, 2889.
- (34) F. Song, Z. Xu, Q. Zhang, Z. Zhao, H. Zhang, W. Zhao, Z. Qiu, C. Qi, H. Zhang, H. H. Y. Sung, I. D. Williams, J. W. Y. Lam, Z. Zhao, A. Qin, D. Ma, B. Z. Tang, *Adv. Funct. Mater.* **2018**, *28*, 1800051.
- (35) Z. Wu, H. Han, Z. Yan, X. Luo, Y. Wang, Y. Zheng, J. Zuo, Y. Pan, *Adv. Mater.* **2019**, *31*, 1900524.
- (36) Y. Wang, Y. Zhang, W. Hu, Y. Quan, Y. Li, Y. Cheng, *ACS Appl. Mater. Interfaces* **2019**, *11*, 26165.

- (37) N. Sharma, E. Spuling, C. M. Mattern, W. Li, O. Fuhr, Y. Tsuchiya, C. Adachi, S. Br äse, I. D. W. Samuel, E. Zysman-Colman, *Chem. Sci.* **2019**, *10*, 6689.
- (38) Z. Wu, Z. Yan, X. Luo, L. Yuan, W. Liang, Y. Wang, Y. Zheng, J. Zuo, Y. Pan, *J. Mater. Chem. C* **2019**, *7*, 7045.
- (39) Y. Wang, H. Lu, C. Chen, M. Li, C. Chen, *Org. Electron.* **2019**, *70*, 71.
- (40) . Sun, J. Wang, L. Chen, R. Chen, J. Jin, C. Chen, S. Chen, G. Xie, C. Zheng, W. Huang, *J. Mater. Chem. C* **2019**, *7*, 14511.
- (41) M. Li, Y. Wang, D. Zhang, L. Duan, C. Chen, *Angew. Chem. Int. Ed.* **2020**, *59*, 3500.
- (42) Z. Tu, Z. Yan, X.Liang, L. Chen, Zh. Wu, Y. Wang, Y. Zheng, J. Zuo, Y. Pan, *Adv. Sci.* **2020**, *7*, 2000804.
- (43) L. Fr é d éric, A. Desmarchelier, R. Plais, L. Lavnevich, G. Muller, C. Villafuerte, G. Clavier, E. Quesnel, B. Racine, S. Meunier-Della-Gatta, J.-P. Dognon, P. Thu éry, J. Crassous, L. Favereau, G. Pieters, *Adv. Funct. Mater.* **2020**, *30*, 2004838.
